# Supplementary material for: Hydroxy proline and gamma-aminobutyric acid: markers of susceptibility to vine decline disease caused by the fungus Monosporascus cannonballus in melons (Cucumis melo L.)
Source: PeerJ. 2023 Mar 2;11:e14932. doi: 10.7717/peerj.14932 (PMC9985897; doi:10.7717/peerj.14932)
Supplement: Supplemental Information 1 — Each data point indicates the concentration of amino acids per treatment per repetition [file peerj-11-14932-s001.xlsx]

## Sheet: Sheet1
0 hours	Gln	Ser	Asp	Thr	Gly	β-Ala	Ala	GABA	Met	Try	Phe	Ile	Leu	Cit	Hy Pro	Val
T1R1	0	0	0	0	0	0	54.9407	10.292	29.0838	0	0	0	0	0	0	0
T1R2	0	0	60.835	40.7412	0	0	93.447	8.67439	27.1756	0.526762	0	0	0	0	0	0
T1R3	0	0	0	0	0	0	88.7839	10.8545	0	0	0	0	0	0	0	0
T2R1	0	0	138.718	22.4723	0	16.002	21.3561	11.073	4.37865	0	0	0	0	0	0	0
T2R2	0	0	57.5032	88.0841	0	44.1677	23.2524	9.5585	11.1134	0	0	0	0	0	0	0
T2R3	0	0	0	14.7111	0	11.1563	10.8513	3.978	0	0	0	0	0	0	0	0
T3R1	14.4539	1.69294	131.677	30.4558	1.00282	13.3872	9.82466	2.35935	6.67834	3.38734	2.0877	4.51493	4.12281	0	0	0
T3R2	18.6669	1.50267	423.338	85.8342	0	19.8028	13.0872	7.44172	7.68219	6.6276	1.69885	5.12692	3.48625	2.67159	0.717476	2.04712
T3R3	0	0	479.306	78.3049	0	22.6257	25.8504	7.03464	26.1501	8.76028	1.25399	0	0	0	0	0
T4R1	3.14865	0	463.196	79.0096	0	21.2603	20.6527	6.79454	46.1712	1.40212	0.159784	0.509454	0	0	0	0
T4R2	3.75032	0	512.055	93.7284	0	25.0989	21.2329	9.39351	42.6573	5.74084	0	0	0	0	0	0
T4 R3	0	0	185.707	53.8331	0	15.8667	19.0525	9.20777	40.4373	1.22296	0	0	0	0	0	0.412297
Average	3.33498	0.266301	204.361	48.9312	0.0835681	15.7806	33.5276	8.05516	20.1273	2.30566	0.433359	0.845942	0.634089	0.222633	0.0597896	0.204951
S.E	1.84202	0.179922	59.2001	10.2103	0.0835681	3.65145	8.45446	0.77744	4.95418	0.892075	0.22342	0.538953	0.429294	0.222633	0.0597896	0.170929
24 hours	Gln	Cit	Ser	Asp	Thr	Gly	β-Ala	Ala	GABA	Pro	Met	Phe	Ile	Leu	Val	Hy Pro
T1R1	162.6	0	0	1075.7	73.8765	5.26888	0	37.258	32.6159	0	29.4465	0	0	0	0	0
T1R2	140.957	18.7624	3.5999	950.313	46.1654	0	0	850.383	21.1879	0	7.33439	0	0	0	0	0
T1R3	204.085	10.0283	0	1317.93	76.5742	0	0	35.9409	21.8102	0	0	0	0	0	0	0
T2R1	0	0	0	31.3044	0	0	0	19.0653	6.76085	0	3.35727	0	0	0	0	0
T2R2	0	0	0	48.5451	20.9948	0	0	4.3412	1.03367	0	11.0678	0	0	0	0	0
T2R3	34.2092	0	0	542.29	31.4354	0	0	18.6264	20.1534	0	0	0	0	0	0	0
T3R1	57.5059	0	0	455.579	57.6876	0	0	19.6848	26.6464	0	0	0	0	0	4.04444	0
T3R2	56.5339	0	0	570.881	58.4622	0	0	26.2389	33.7833	0	22.5945	0	0	0	0	0
T3R3	94.4821	0	0	536.188	38.9573	0	0	38.005	21.3788	0	31.8233	0	0	0	0	14.2801
T4R1	0	0	0	0	0	0	0	4.43443	0	0	21.7968	0	0	0	0	0
T4R2	0	0	0	0	13.7479	0	0	12.3233	0	0	46.3573	0	0	0	0	0
T4R3	0	0	0	0	0	0	6.69984	25.9996	0	0	55.4529	0	2.94312	0	0	0
Average	62.5311	2.39922	0.299991	460.727	34.8251	0.439073	0.55832	91.025	15.4475	0	19.1026	0	0.24526	0	0.337036	1.19001
S.E	20.896	1.70453	0.299991	133.946	8.1559	0.439073	0.55832	69.1124	3.78016	0	5.43426	0	0.24526	0	0.337036	1.19001
48 hours	Gln	Cit	Hy Pro	Ser	Thr	Gly	β-Ala	Ala	GABA	Pro	Met	Asp
T1R1	1.41133	47.2562	0	0	26.123	704.245	68.2586	462.475	0	0	0	217.203
T1R2	0	77.0318	0	0	42.9546	724.574	0	598.52	0	5.54013	0	0
T1R3	0	62.4034	0	0	0	662.459	0	615.673	0	0	0	0
T2R1	22.6352	0	0	39.7272	0	483.7	79.3225	453.205	0	0	6.85354	0
T2R2	0	0	0	13.3471	0	0	103.835	504.834	0	0	8.91399	0
T2R3	0	0	0	28.2135	0	0	184.866	748.104	0	0	19.72	267.018
T3R1	0	0	0	0	0	0	0	0	0	0	0	272.221
T3R2	0	66.6988	33.9305	7.50146	0	0	51.3211	270.003	149.989	2.42279	0	597.901
T3R3	0	17.9747	67.0019	29.6586	0	0	310.411	246.709	417.61	0	0	0
T4R1	0	0	0	0	0	0	11.0158	2.72353	7.55122	0	19.3399	0
T4R2	0	0	0	3.53524	0	0	2.13269	7.4939	4.16774	0	4.03228	0
T4R3	0	0	0	0	0	0	3.99062	13.4193	3.13586	0	5.38384	0
Average	2.00388	22.6137	8.41103	10.1653	5.75647	214.581	67.9295	326.93	48.5378	0.663576	5.35363	112.862
S.E	1.87923	9.00188	6.02494	4.13852	4.01688	92.9827	27.4782	78.9364	35.7504	0.486787	2.11533	54.856
72 hours	Gln	Cit	Hy Pro	Thr	Gly	β-Ala	Ala	GABA	Met	Try	Pro
T1R1	17.2177	0	0	0	0	9.11333	47.478	17.648	0	0	0
T1R2	82.9407	0	0	38.267	0	153.355	35.5171	72.4899	29.9639	0	0
T1R3	78.2986	0	0	54.9825	0	137.737	40.5368	87.7327	25.5396	0	0
T2R1	0	0	0	9.45711	0	45.2907	23.9913	33.9751	24.3741	0	0
T2R2	0	0	0	0	0	117.116	45.7293	66.7858	36.2321	0	0
T2R3	0	0	0	0	0	164.471	54.8175	80.698	36.5483	0	0
T3R1	0	86.3303	23.6354	0	17.7554	338.709	72.1454	79.5523	12.3561	0	0
T3R2	0	68.0831	0	0	34.329	240.018	68.1678	106.254	128.685	0	0
T3R3	0	79.345	104.363	6.15154	46.4929	166.355	55.8854	88.7814	21.0925	0	0
T4R1	0	0	0	0	0	235.47	66.1567	106.664	53.3924	1.13333	0
T4R2	0	0	0	0	0	134.378	144.472	63.827	31.4735	0	3.28962
T4R3	0	0	0	0	0	126.82	91.2787	80.5624	31.1203	0	0
Average	14.8714	19.4799	10.6665	9.07151	8.21478	155.736	62.1813	73.7476	35.8982	0.0944441	0.274135
S.E	8.98331	10.236	8.74076	5.24203	4.64296	25.2171	9.1237	7.57172	9.25067	0.0944441	0.274135
